# Supplementary material
Source: MDPI journal article supplement (https://www.mdpi.com/2073-4433/15/2/182)
Supplement: s1 [file s1]

---

# Supplementary Materials: Radar, Lightning, and Synoptic Observations for a Thunderstorm on 7 January 2012 during the CHUVA-Vale Campaign

João Gabriel Martins Ribeiro <sup>1</sup>, Enrique Vieira Mattos <sup>1</sup>, Michelle Simões Reboita <sup>1,\*</sup>, Diego Pereira Enoré <sup>2</sup>, Izabelly Carvalho da Costa <sup>2</sup>, Rachel Ifanger Albrecht <sup>3</sup>, Weber Andrade Gonçalves <sup>4</sup> and Rômulo Augusto Jucá Oliveira <sup>5</sup>

<sup>1</sup> Institute of Natural Resources, Federal University of Itajubá, Avenida BPS 1303, Itajubá 37500-903, MG, Brazil

<sup>2</sup> Center for Weather Forecasting and Climate Studies (CPTEC), National Institute for Space Research, Cachoeira Paulista 12630-000, SP, Brazil

<sup>3</sup> Department of Atmospheric Sciences, Astronomy Institute, Atmospheric and Geophysical Sciences, University of São Paulo (USP), Sao Paulo 05508-090, SP, Brazil

<sup>4</sup> Department of Atmospheric and Climatic Sciences, Federal University of Rio Grande do Norte, Av. Senador Salgado Filho 3000, Lagoa Nova, Natal 59078-970, RN, Brazil

<sup>5</sup> Centre National de la Recherche Scientifique, Géosciences Environnement Toulouse (GET), 14 Av. Edouard Belin, Complexe Scientifique de Rangueil, 31400 Toulouse, France

\* Correspondence: [reboita@unifei.edu.br](mailto:reboita@unifei.edu.br)

---

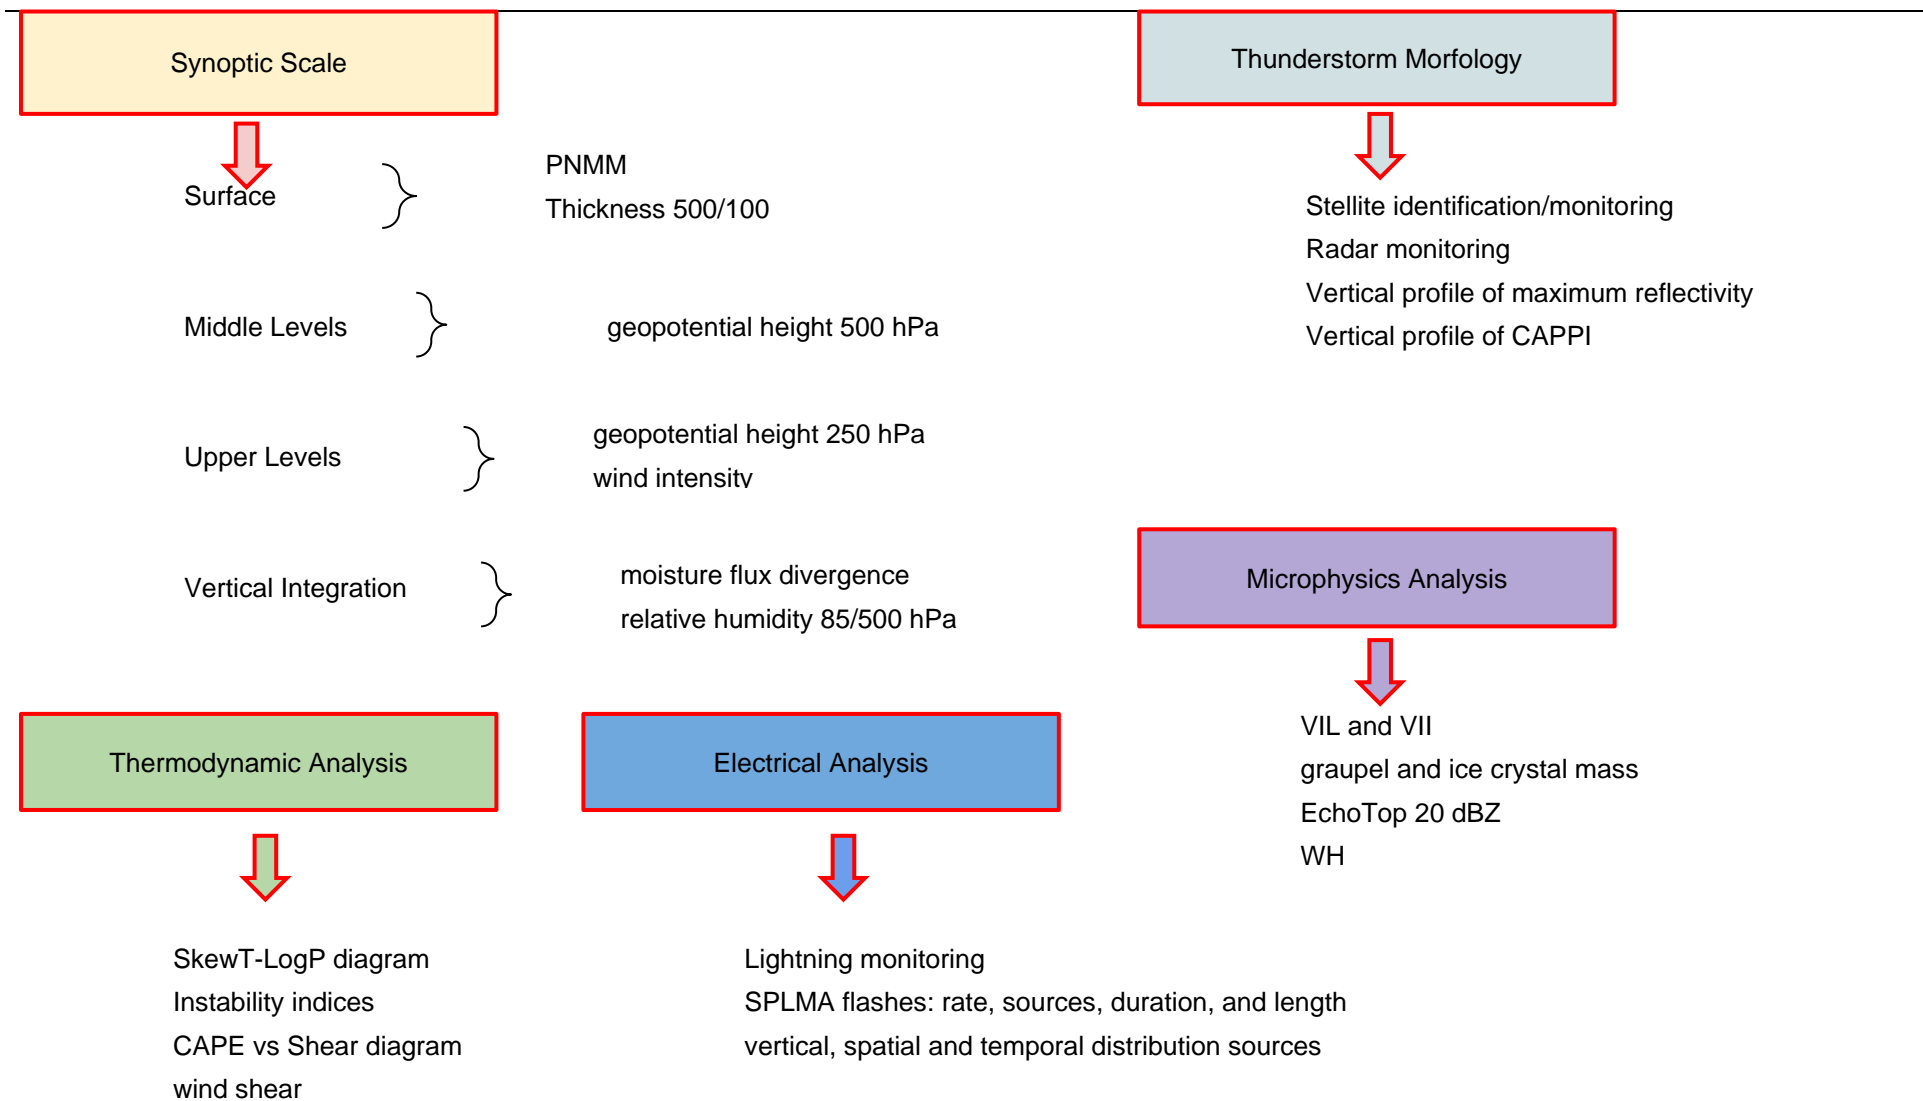

**Figure S1.** Summary of the methodology.

**Table S1.** Abbreviation Table.

| Abbreviation                                      | Meaning      |
|---------------------------------------------------|--------------|
| Cb                                                | Cumulonimbus |
| Metropolitan Area of São Paulo                    | MASP         |
| Convective Available Potential Energy             | CAPE         |
| Vertically Integrated Liquid water content        | VIL          |
| Vertically Integrated Ice content                 | VII          |
| Severe Hail Index                                 | SHII         |
| Waldvogel Height parameter                        | WH           |
| intra-cloud lightning                             | IC           |
| cloud-to-ground lightning                         | CG           |
| differential reflectivity                         | ZDR          |
| lightning jump                                    | LJ           |
| Lightning Mapping Array                           | LMA          |
| Very High Frequency                               | VHF          |
| South Atlantic Convergence Zone                   | SACZ         |
| Hydraulic Technological Center Foundation         | FCTH         |
| Brazilian Atmospheric Discharge Detection Network | BrasilDAT    |
| São Paulo Lightning Mapper Array                  | SPLMA        |
| Constant Altitude Plan Position Indicator         | CAPPI        |
| brightness temperature                            | BT           |
| Moisture Convergence Zone                         | MCZ          |
